# Supplementary figures and images for: L1CAM High Expression Associates with Poor Prognosis in Glioma but Does Not Correlate with C11orf95‐RELA Fusion
Source: Hindawi journal article supplement (doi:10.1155/2020/1353284), 2020-01-01

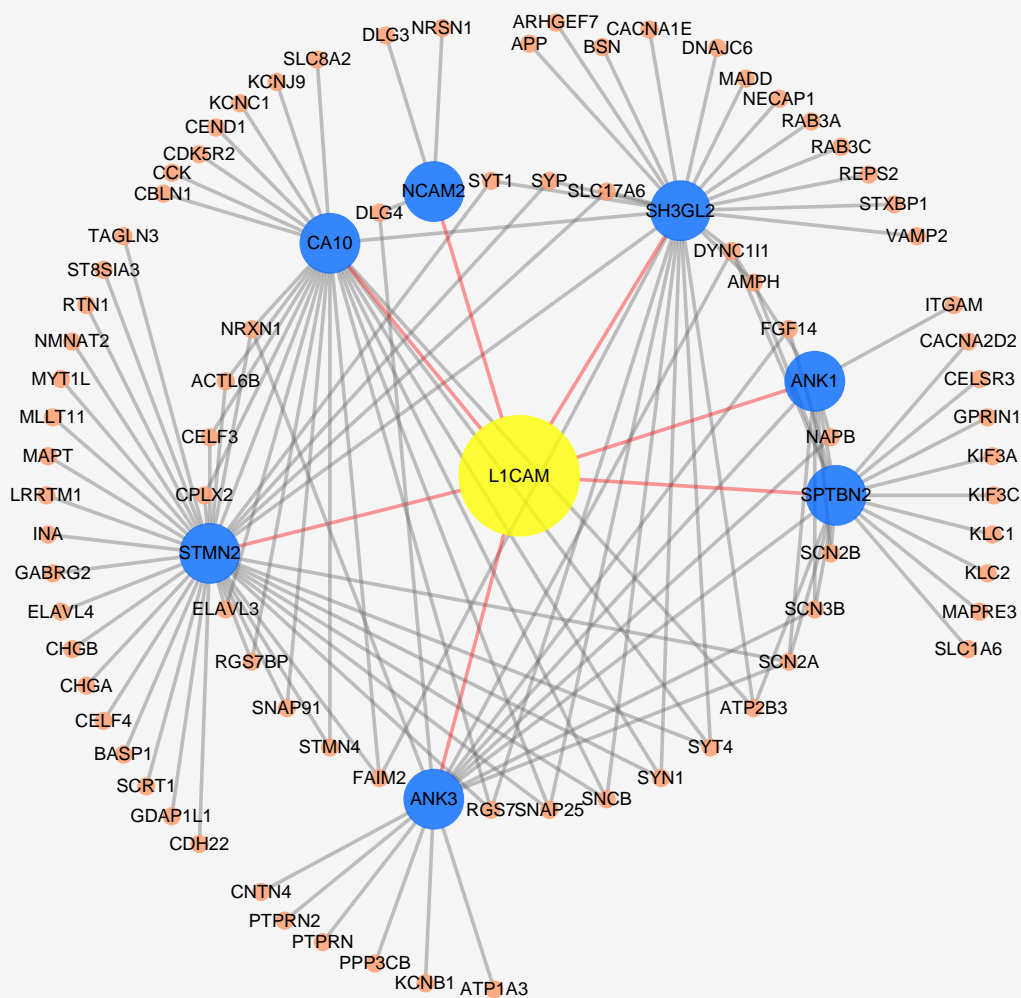

Supplement: f1 [file 1353284.f1.zip]

**L1CAM-Remdrandt**

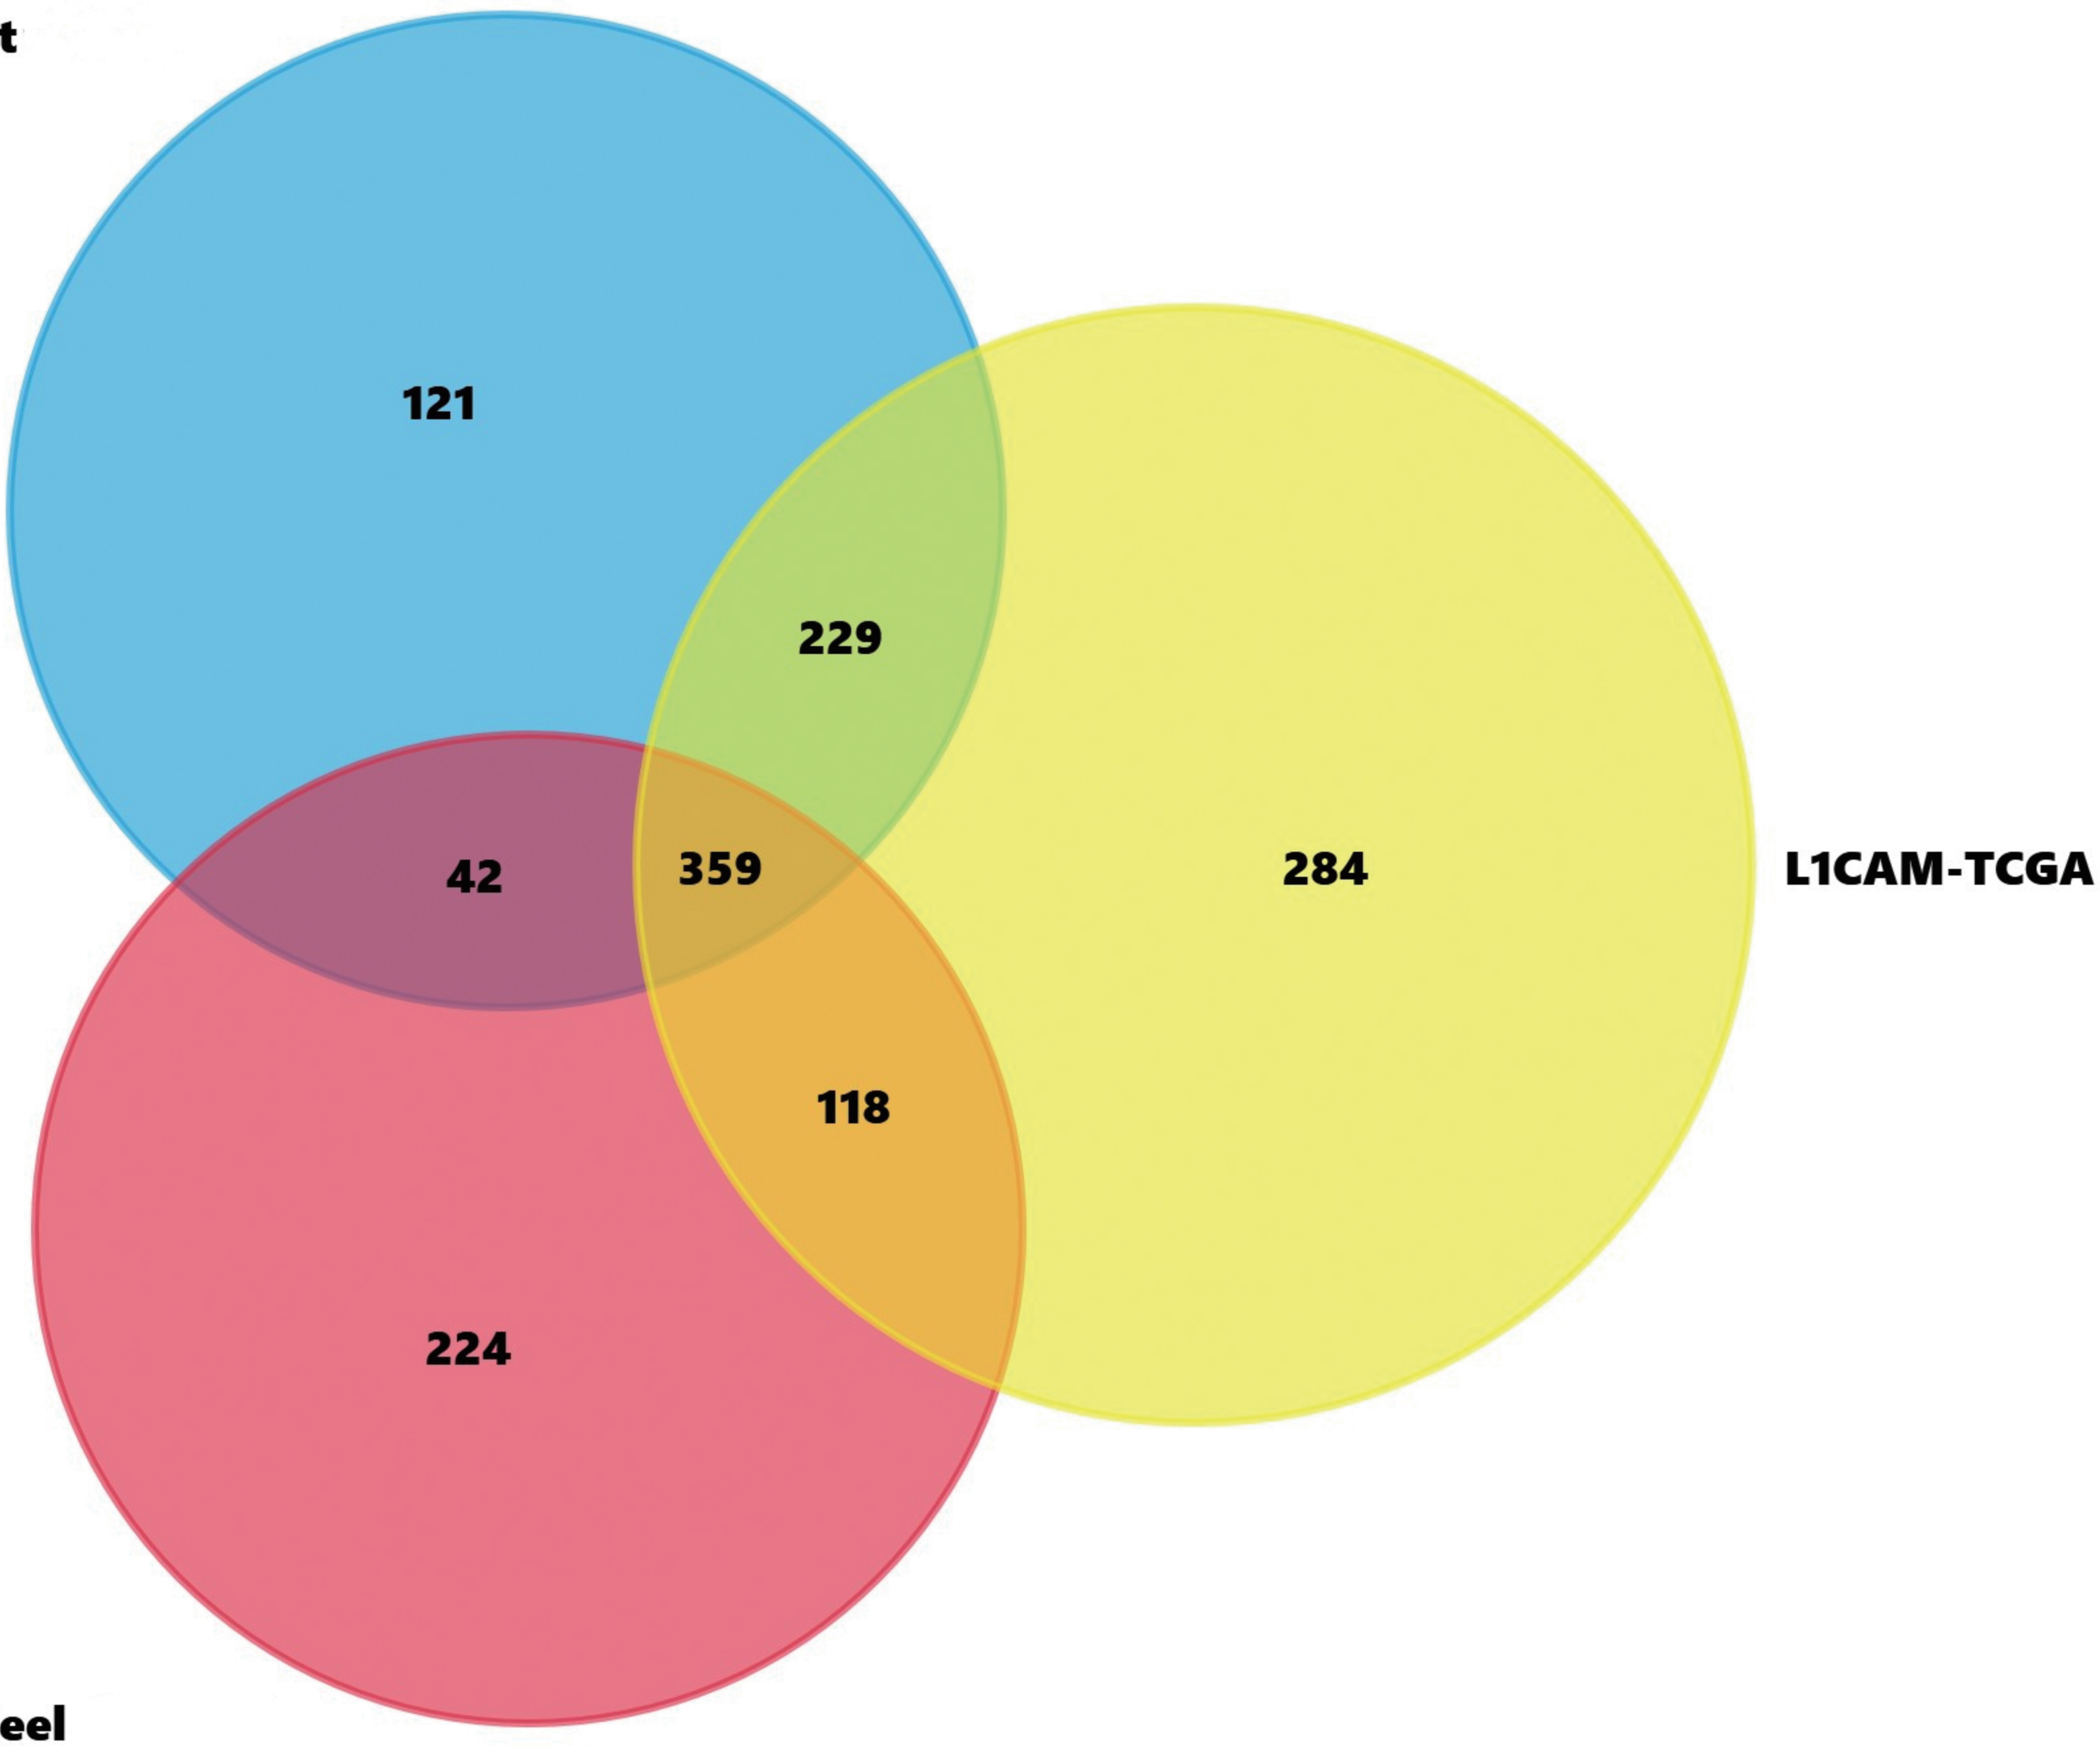

**L1CAM-TCGA**

**L1CAM-Gravendeel**

Supplement: f1 [file 1353284.f1.zip]
